# Supplementary material for: Multi-Class Determination of 64 Illicit Compounds in Dietary Supplements Using Liquid Chromatography–Tandem Mass Spectrometry
Source: PubMed Central journal article supplement (PMC7583945; doi:10.3390/molecules25194399), 2020-09-24
Supplement: molecules-25-04399-s001.pdf [file molecules-25-04399-s001.pdf]

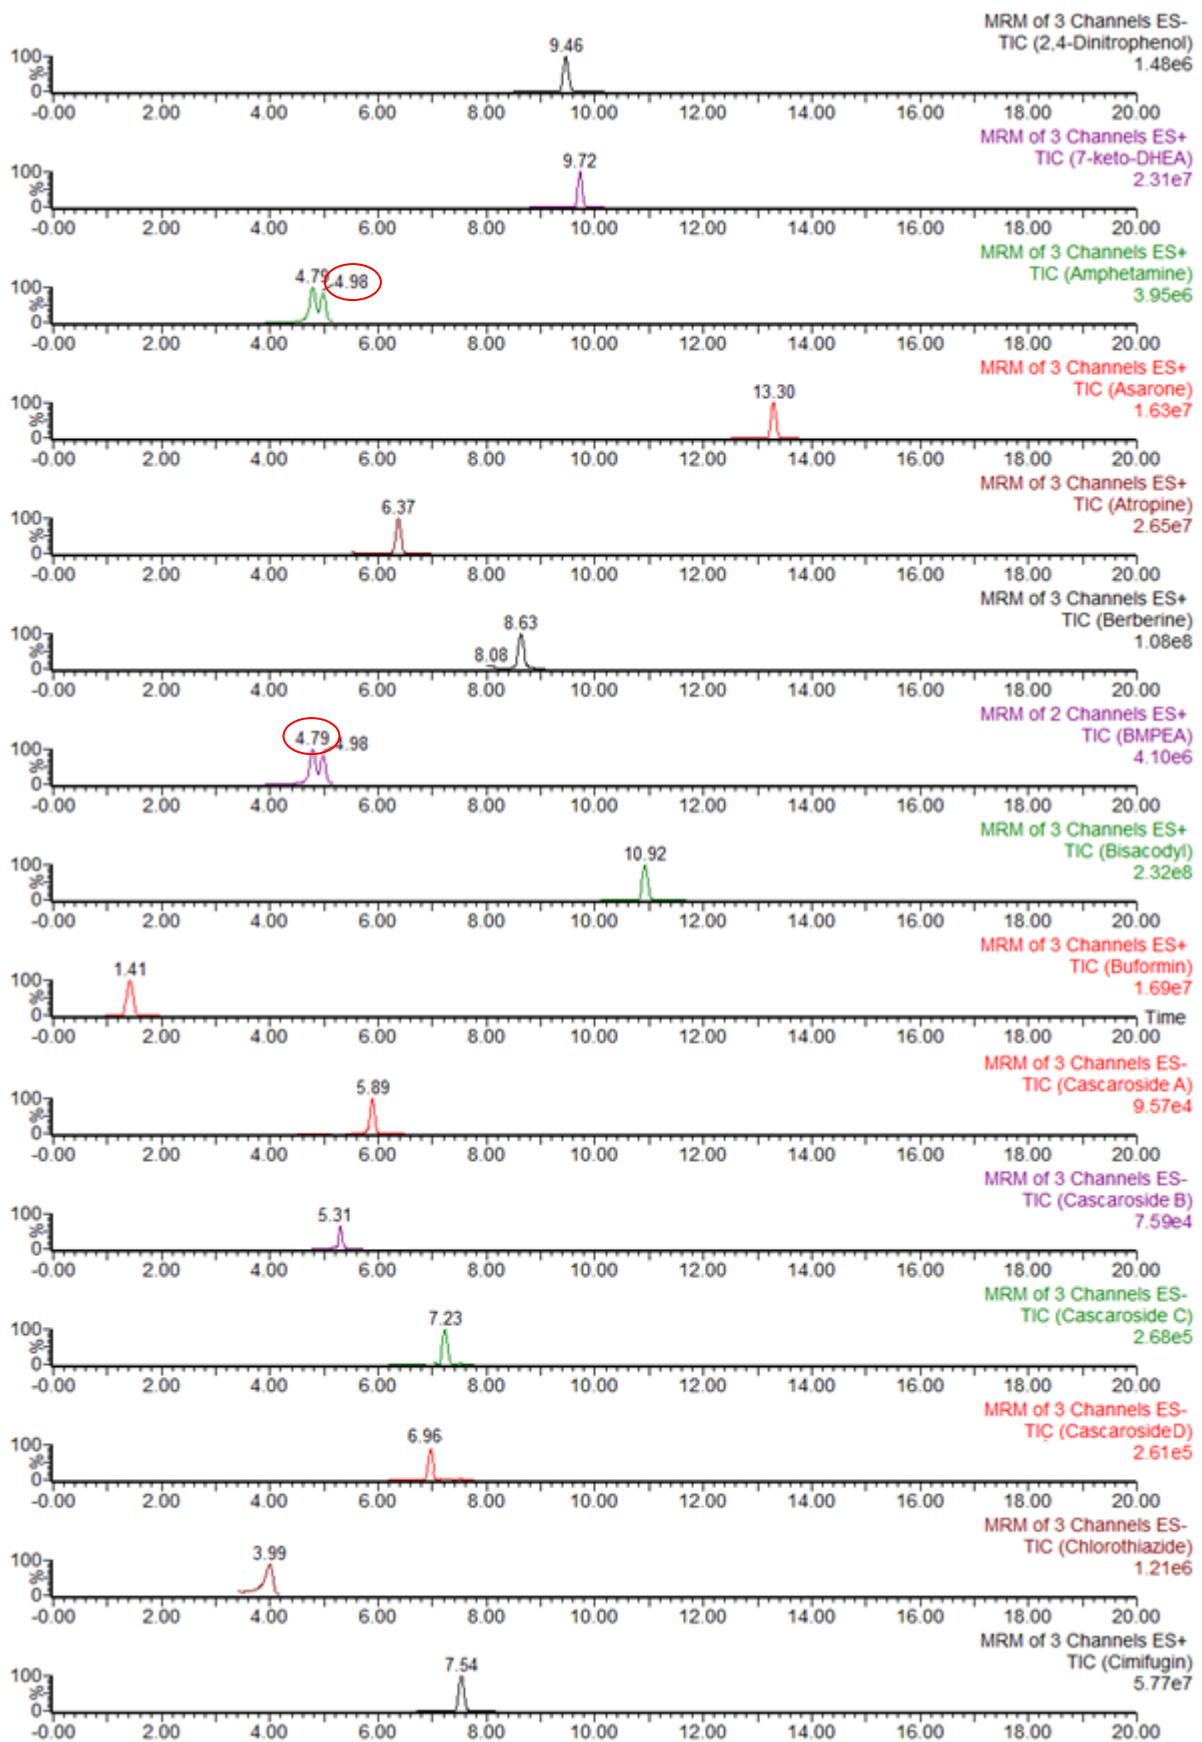

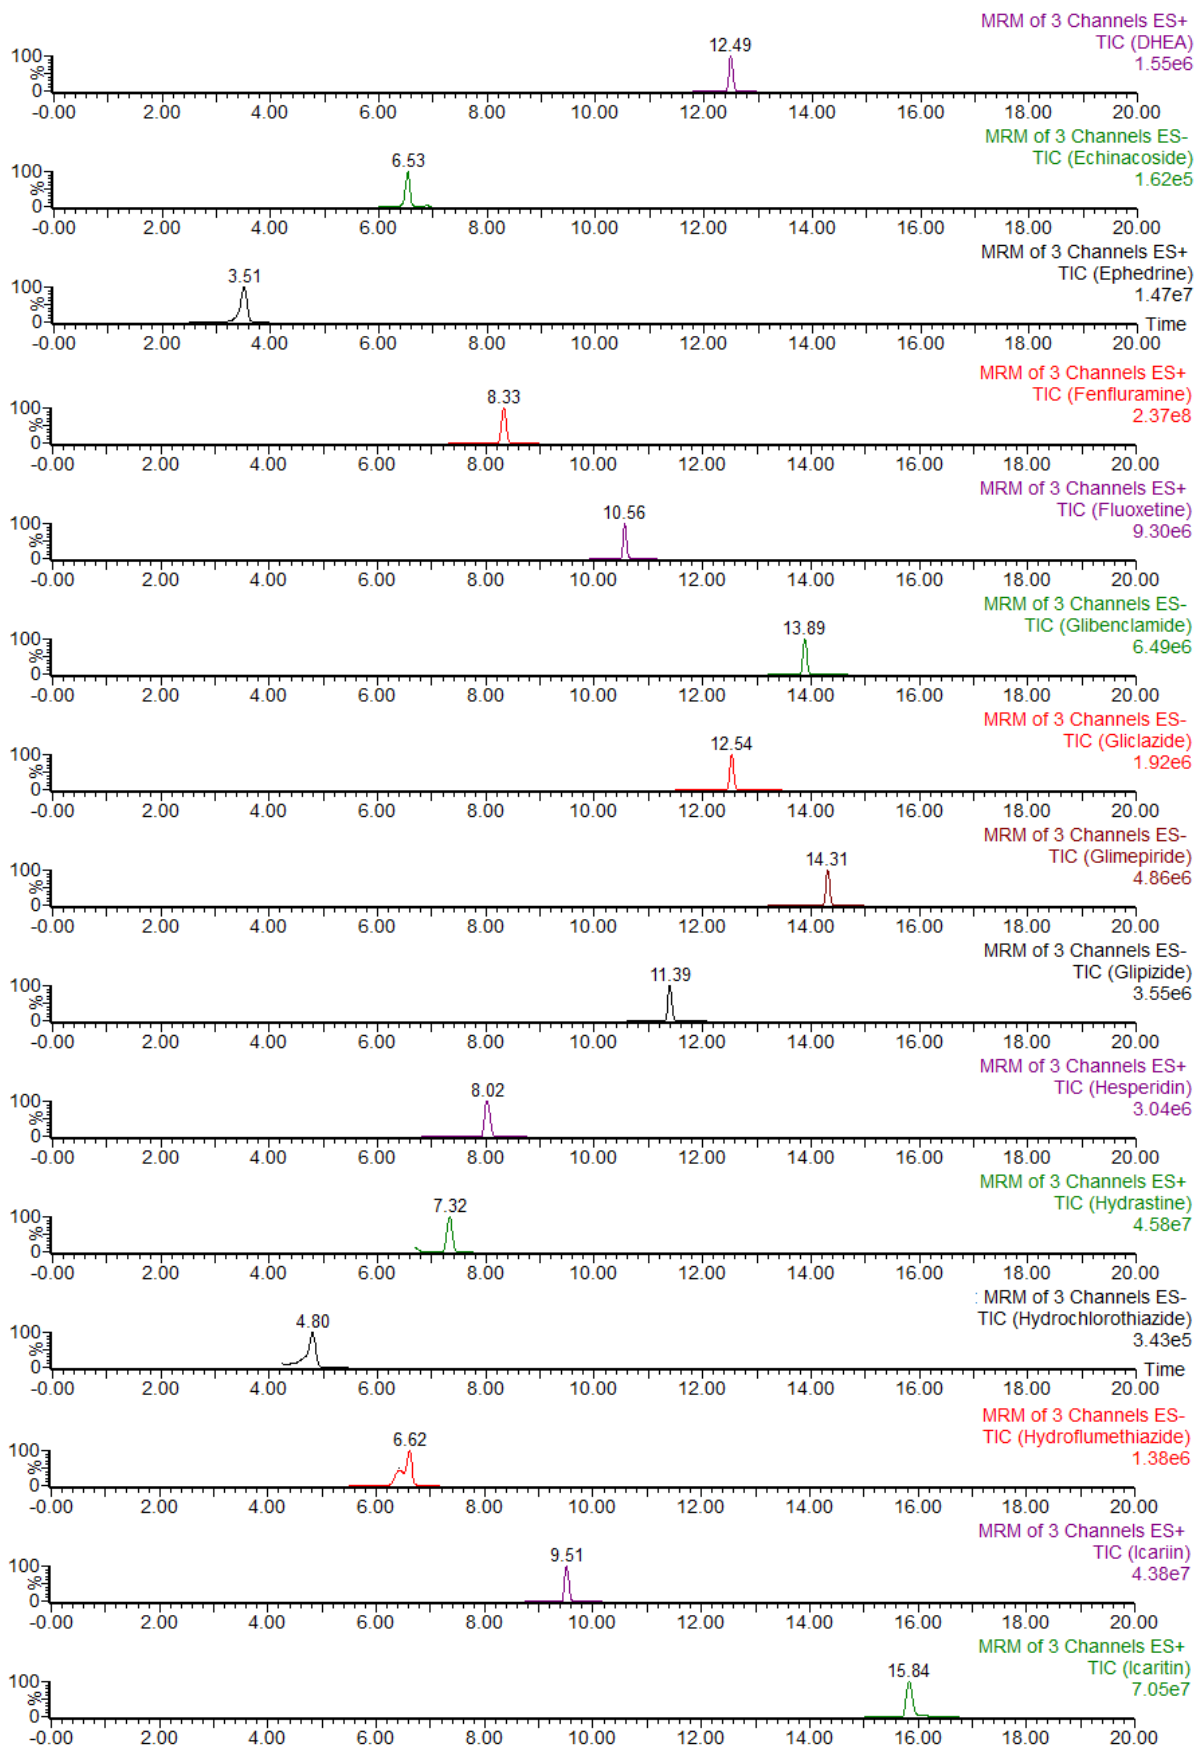

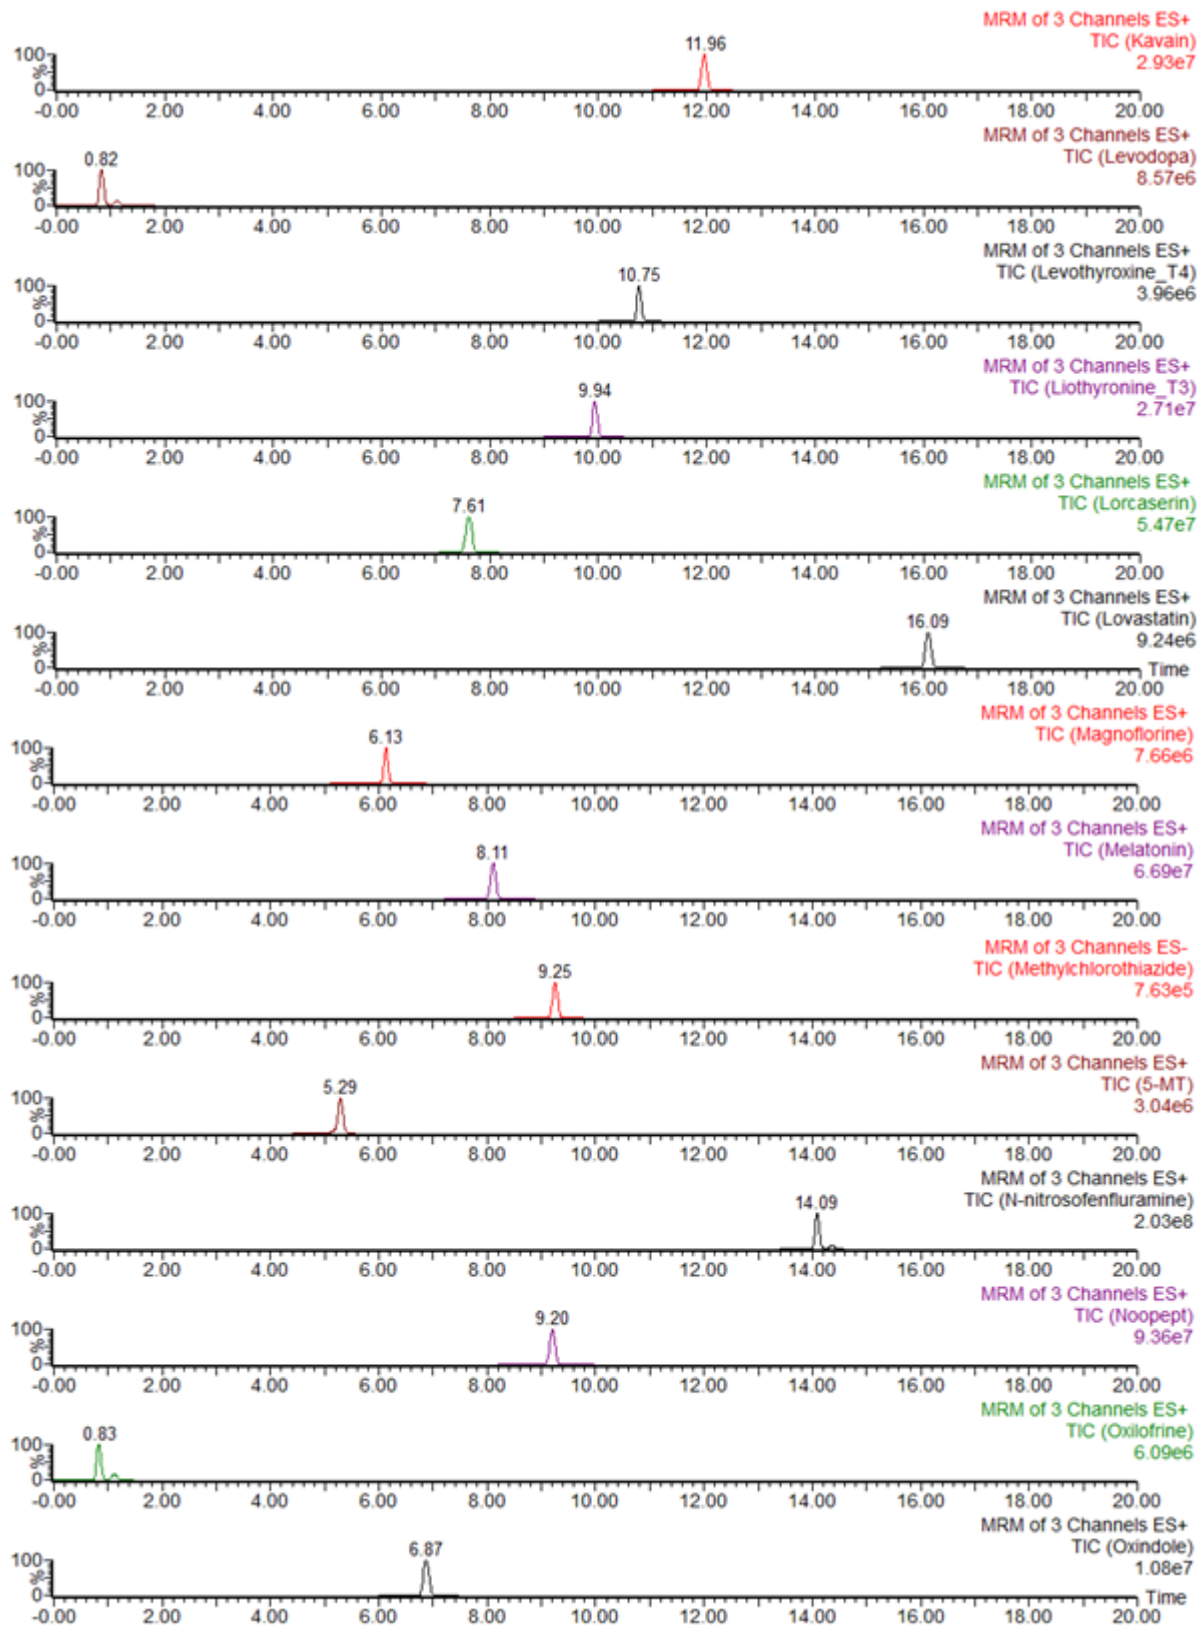

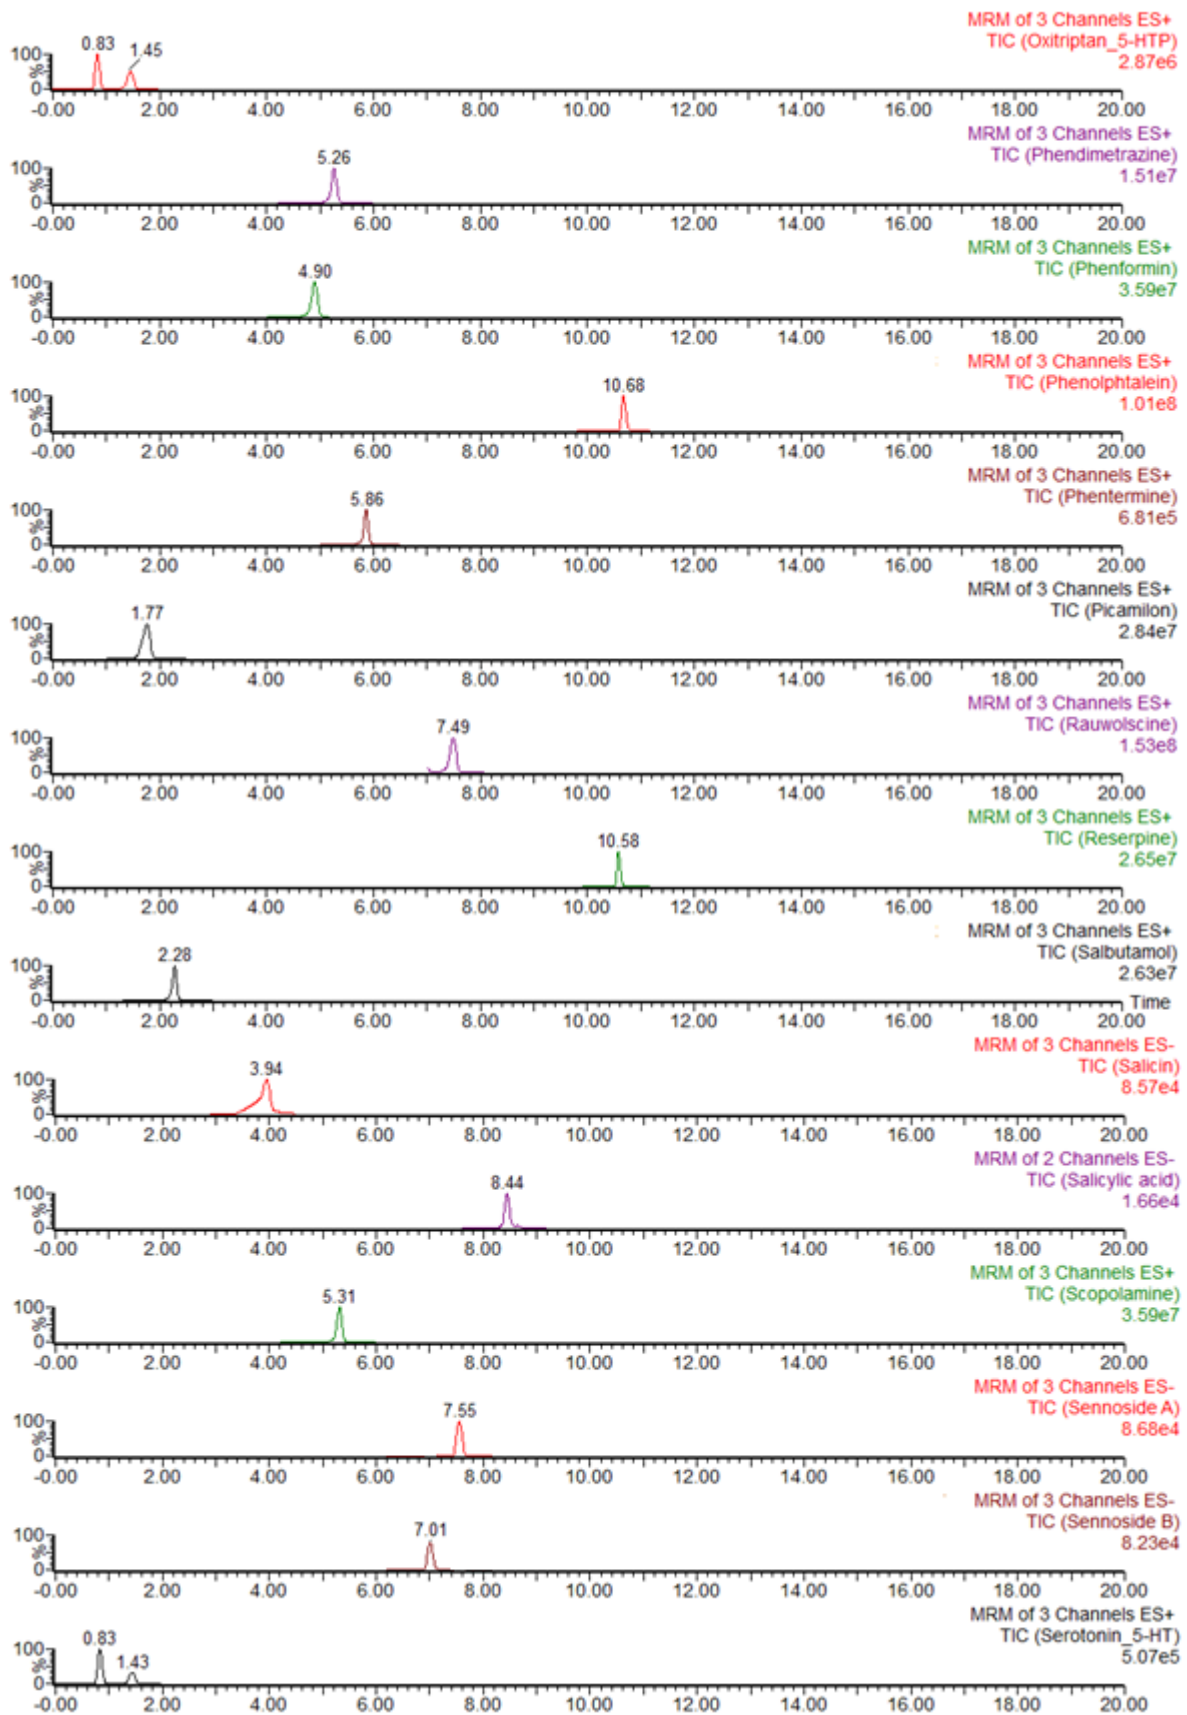

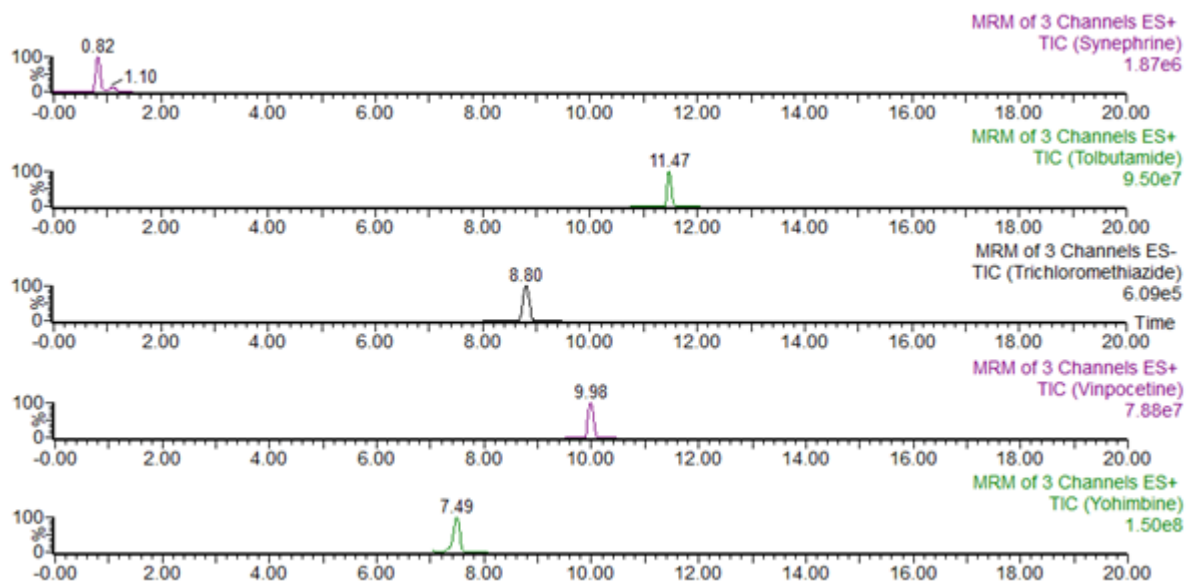

Figure S1. Chromatogram of 66 compounds at 0.05 mg L<sup>-1</sup>

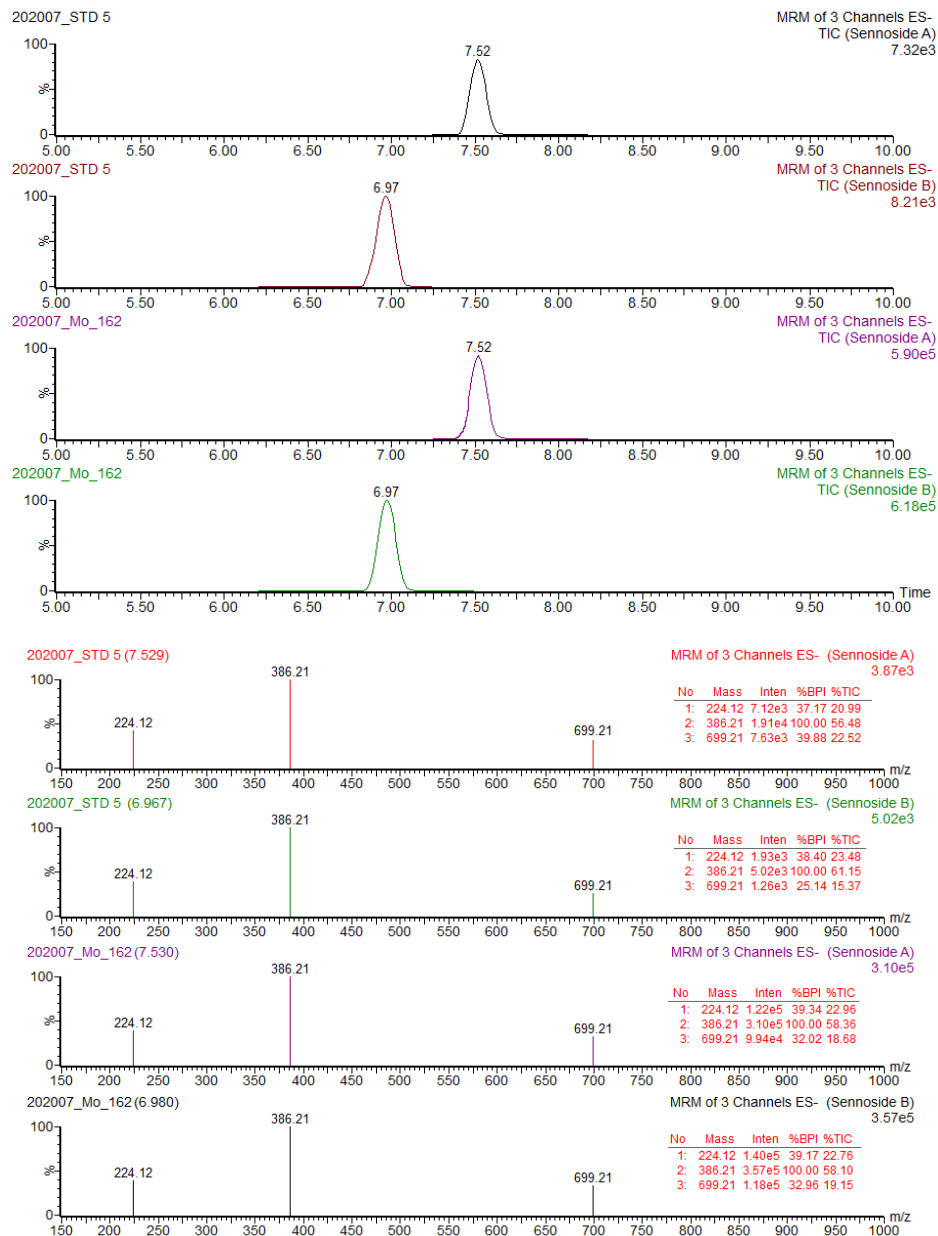

Figure S2. Example of chromatogram and mass spectra in sample (S-162, sennosides)

Table S1. Selection criteria of 66 target compounds based on Korean legislation.

| Compounds                                   | Prohibited compounds <sup>1)</sup> | Pharmaceutical | Not authorized ingredients <sup>2)</sup> | Compounds                           | Prohibited compounds <sup>1)</sup> | Pharmaceutical | Not authorized ingredients <sup>2)</sup> |
|---------------------------------------------|------------------------------------|----------------|------------------------------------------|-------------------------------------|------------------------------------|----------------|------------------------------------------|
| 2,4-Dinitrophenol (2,4-DNP)                 |                                    | O              |                                          | Liothyronine                        | O                                  | O              |                                          |
| 7-keto-dehydroepiandrosterone (7-keto-DHEA) |                                    | O              |                                          | Lorcaserine                         |                                    | O              |                                          |
| Amphetamine                                 |                                    | O              |                                          | Lovastatin                          |                                    | O              |                                          |
| Asarone                                     |                                    |                | O                                        | Magnoflorine                        |                                    |                | O                                        |
| Atropine                                    |                                    | O              |                                          | Melatonin                           |                                    | O              |                                          |
| Berberine                                   |                                    |                | O                                        | Metformin                           |                                    | O              |                                          |
| beta-methylphenethylamine (BMPEA)           |                                    | O              |                                          | Methylclothiazide                   |                                    | O              |                                          |
| Bisacodyl                                   |                                    | O              |                                          | Mexamine (5-methoxytryptamine)      |                                    | O              |                                          |
| Buformin                                    |                                    | O              |                                          | N-nitrosofenfluramine               | O                                  | O              |                                          |
| Cascarside A                                | O                                  |                | O                                        | Noopept                             |                                    | O              |                                          |
| Cascarside B                                | O                                  |                | O                                        | Oxilofrine                          |                                    | O              |                                          |
| Cascarside C                                | O                                  |                | O                                        | Oxindole                            |                                    |                | O                                        |
| Cascarside D                                | O                                  |                | O                                        | Oxitriptan (5-hydroxytryptophane)   |                                    | O              |                                          |
| Chlorothiazide                              |                                    | O              |                                          | Phendimetrazine                     |                                    | O              |                                          |
| Cimifugin                                   |                                    |                | O                                        | Phenformin                          |                                    | O              |                                          |
| Dehydroepiandrosterone (DHEA)               |                                    | O              |                                          | Phenolphthalein                     | O                                  | O              |                                          |
| Echinacoside                                |                                    |                | O                                        | Phentermine                         |                                    | O              |                                          |
| Ephedrine                                   | O                                  | O              |                                          | Picamilon                           |                                    | O              |                                          |
| Fenfluramine                                | O                                  | O              |                                          | Rauwolfscine ( $\alpha$ -yohimbine) | O                                  |                | O                                        |
| Fluoxetine                                  | O                                  | O              |                                          | Reserpine                           |                                    | O              |                                          |
| Glibenclamide                               | O                                  | O              |                                          | Salbutamol                          |                                    | O              |                                          |
| Gliclazide                                  | O                                  | O              |                                          | Salicin                             |                                    |                | O                                        |
| Glimepiride                                 | O                                  | O              |                                          | Salicylic acid                      |                                    |                | O                                        |
| Glipizide                                   | O                                  | O              |                                          | Scopolamine                         |                                    | O              |                                          |
| Hesperidin                                  |                                    |                | O                                        | Sennoside A                         | O                                  |                | O                                        |
| Hydrastine                                  |                                    |                | O                                        | Sennoside B                         | O                                  |                | O                                        |
| Hydrochlorothiazide                         |                                    | O              |                                          | Serotonin (5-hydroxytryptamine)     |                                    | O              |                                          |
| Hydroflumethiazide                          |                                    | O              |                                          | Synephrine                          |                                    | O              |                                          |
| Icariin                                     | O                                  |                | O                                        | Tolbutamide                         |                                    | O              |                                          |
| Icaritin                                    |                                    | O              |                                          | Trichloromethiazide                 |                                    | O              |                                          |
| Kavain                                      |                                    |                | O                                        | Trigonelline                        |                                    |                | O                                        |
| Levodopa                                    |                                    | O              |                                          | Vinpocetine                         |                                    |                | O                                        |
| Levothyroxine                               | O                                  | O              |                                          | Yohimbine ( $\beta$ -yohimbine)     | O                                  |                | O                                        |

1) Prohibited by Food and Sanitation Act in Ministry of Food and Drug Safety in Korea

2) Not authorized food ingredients by Food Code in Korea

Table S2. The manufacturer and purity on target compounds

| Compounds                                  | Cas No.     | Company       | Purity (%) | Compounds                          | Cas No.     | Company       | Purity (%) |
|--------------------------------------------|-------------|---------------|------------|------------------------------------|-------------|---------------|------------|
| 2,4-Dinitrophenol (2,4-DNP)                | 51-28-5     | Sigma-aldrich | 98.0       | Liothyronine                       | 6893-02-03  | Sigma-aldrich | 95.0       |
| 7-ketodehydroepiandrosterone (7-keto-DHEA) | 566-19-8    | MFDS          | 99.9       | Lorcaserine                        | 616202-92-7 | MFDS          | 99.0       |
| Amphetamine                                | 300-62-9    | MFDS          | 99.9       | Lovastatin                         | 75330-75-5  | USP           | 100        |
| Asarone                                    | 2883-98-9   | Sigma-aldrich | 98.0       | Magnoflorine                       | 2141-09-05  | Sigma-aldrich | 98.0       |
| Atropine                                   | 51-55-8     | MFDS          | 97.0       | Melatonin                          | 73-31-4     | Sigma-aldrich | 98.0       |
| Berberine                                  | 633-65-8    | Sigma-aldrich | 95.0       | Metformin                          | 657-24-9    | Sigma-aldrich | 98.0       |
| beta-methylphenethylamine (BMPEA)          | 582-22-9    | MFDS          | 95.0       | Methylclothiazide                  | 135-07-9    | USP           | 99.0       |
| Bisacodyl                                  | 603-50-9    | Sigma-aldrich | 98.0       | Mexamine (5-methoxytryptamine1)    | 608-07-1    | Sigma-aldrich | 97.0       |
| Buformin                                   | 692-13-7    | Sigma-aldrich | 98.0       | N-nitrosufenfluramine              | 458-24-2    | MFDS          | 99.0       |
| Cascaroside A                              | 53823-08-8  | MFDS          | 98.0       | Noopept                            | 157115-85-0 | Sigma-aldrich | 99.7       |
| Cascaroside B                              | 53861-34-0  | MFDS          | 98.0       | Oxilofrine                         | 365-26-4    | TRC           | 96.0       |
| Cascaroside C                              | 53823-09-9  | MFDS          | 97.0       | Oxindole                           | 59-48-3     | Sigma-aldrich | 97.0       |
| Cascaroside D                              | 53861-35-1  | MFDS          | 99.0       | Oxitriptan (5-hydroxytryptohpane)  | 4350-09-08  | TRC           | 96.0       |
| Chlorothiazide                             | 58-94-6     | Sigma-aldrich | 98.0       | Phendimetrazine                    | 634-03-7    | MFDS          | 99.9       |
| Cimifugin                                  | 53-43-0     | MFDS          | 99.0       | Phenformin                         | 834-28-6    | Sigma-aldrich | 100        |
| Dehydroepiandrosterone (DHEA)              | 82854-37-3  | Sigma-aldrich | 99.0       | Phenolphtalein                     | 1977-09-08  | Sigma-aldrich | 98.0       |
| Echinacoside                               | 299-42-3    | USP           | 90.0       | Phentermine                        | 122-09-8    | MFDS          | 99.0       |
| Ephedrine                                  | 458-24-2    | Sigma-aldrich | 99.0       | Picamilon                          | 34562-97-5  | Sigma-aldrich | 98.0       |
| Fenfluramine                               | 54910-89-3  | MFDS          | 99.2       | Rauwolscine ( $\alpha$ -yohimbine) | 6211-32-1   | Sigma-aldrich | 98.0       |
| Fluoxetine                                 | 10238-21-8  | MFDS          | 98.0       | Reserpine                          | 50-55-5     | USP           | 99.0       |
| Glibenclamide                              | 21187-98-4  | Sigma-aldrich | 99.0       | Salbutamol                         | 18559-94-9  | Sigma-aldrich | 98.0       |
| Gliclazide                                 | 93479-97-1  | Sigma-aldrich | 98.0       | Salicin                            | 138-52-3    | MFDS          | 99.0       |
| Glimepiride                                | 29094-61-9  | Sigma-aldrich | 99.5       | Salicylic acid                     | 69-72-7     | MFDS          | 99.9       |
| Glipizide                                  | 520-26-3    | Sigma-aldrich | 99.8       | Scopolamine                        | 55-16-3     | Sigma-aldrich | 99.0       |
| Hesperidin                                 | 118-08-1    | Sigma-aldrich | 98.0       | Sennoside A                        | 81-27-6     | Wako          | 94.5       |
| Hydrastine                                 | 58-93-5     | USP           | 100        | Sennoside B                        | 128-57-4    | Wako          | 94.5       |
| Hydrochlorothiazide                        | 135-09-1    | USP           | 99.7       | Serotonin (5-hydroxytryptamine)    | 50-67-9     | Sigma-aldrich | 98.5       |
| Hydroflumethiazide                         | 489-32-7    | USP           | 98.0       | Synephrine                         | 1994-07-05  | MFDS          | 99.0       |
| Icariin                                    | 118525-40-9 | Sigma-aldrich | 99.0       | Tolbutamide                        | 64-77-7     | Sigma-aldrich | 98.0       |
| Icaritin                                   | 3155-48-4   | MFDS          | 99.0       | Trichloromethiazide                | 133-67-5    | USP           | 99.5       |
| Kavain                                     | 59-92-7     | Sigma-aldrich | 95.0       | Trigonelline                       | 6138-41-6   | Sigma-aldrich | 100        |
| Levodopa                                   | 51-48-9     | Sigma-aldrich | 100        | Vinpocetine                        | 42971-09-5  | Sigma-aldrich | 100        |
| Levothyroxine                              | 51-28-5     | Sigma-aldrich | 98.0       | Yohimbine ( $\beta$ -yohimbine)    | 146-48-5    | Sigma-aldrich | 98.0       |

1) MFDS, ministry of food and drug safety; USP, U.S. pharmacopeia ;TRC, Toronto research chemicals



Table S3. The collected sample numbers based on sample type and product category

| Sample type         | Sexual performance enhancement | Weight loss | Muscular strengthening | Relaxation | Others | Total |
|---------------------|--------------------------------|-------------|------------------------|------------|--------|-------|
| Capsule             | 19                             | 53          | 10                     | 8          | 12     | 102   |
| Tablet              | 5                              | 8           | 2                      | 2          | 4      | 21    |
| Soft-gel            | 3                              | 4           | -                      | -          | 5      | 12    |
| Powder              | 4                              | 23          | 21                     | -          | 2      | 50    |
| Tea bag             | -                              | 1           | -                      | -          | -      | 1     |
| Energy Bar          | -                              | 2           | -                      | -          | -      | 2     |
| Liquid              | -                              | 3           | 5                      | 1          | 2      | 11    |
| Product category    |                                |             |                        |            |        |       |
| Dietary supplements | 28                             | 92          | 38                     | 10         | 25     | 194   |
| Herbal supplements  | 3                              | 1           | -                      | 1          | -      | 5     |
| Food supplements    | -                              | 1           | -                      | -          | 1      | 2     |
| Total               | 31                             | 94          | 38                     | 11         | 26     | 200   |
